# Supplementary material for: Phylogenomic exploration of the relationships between strains of Mycobacterium avium subspecies paratuberculosis
Source: PubMed Central journal article supplement (PMC4729121; doi:10.1186/s12864-015-2234-5), 2016-01-26

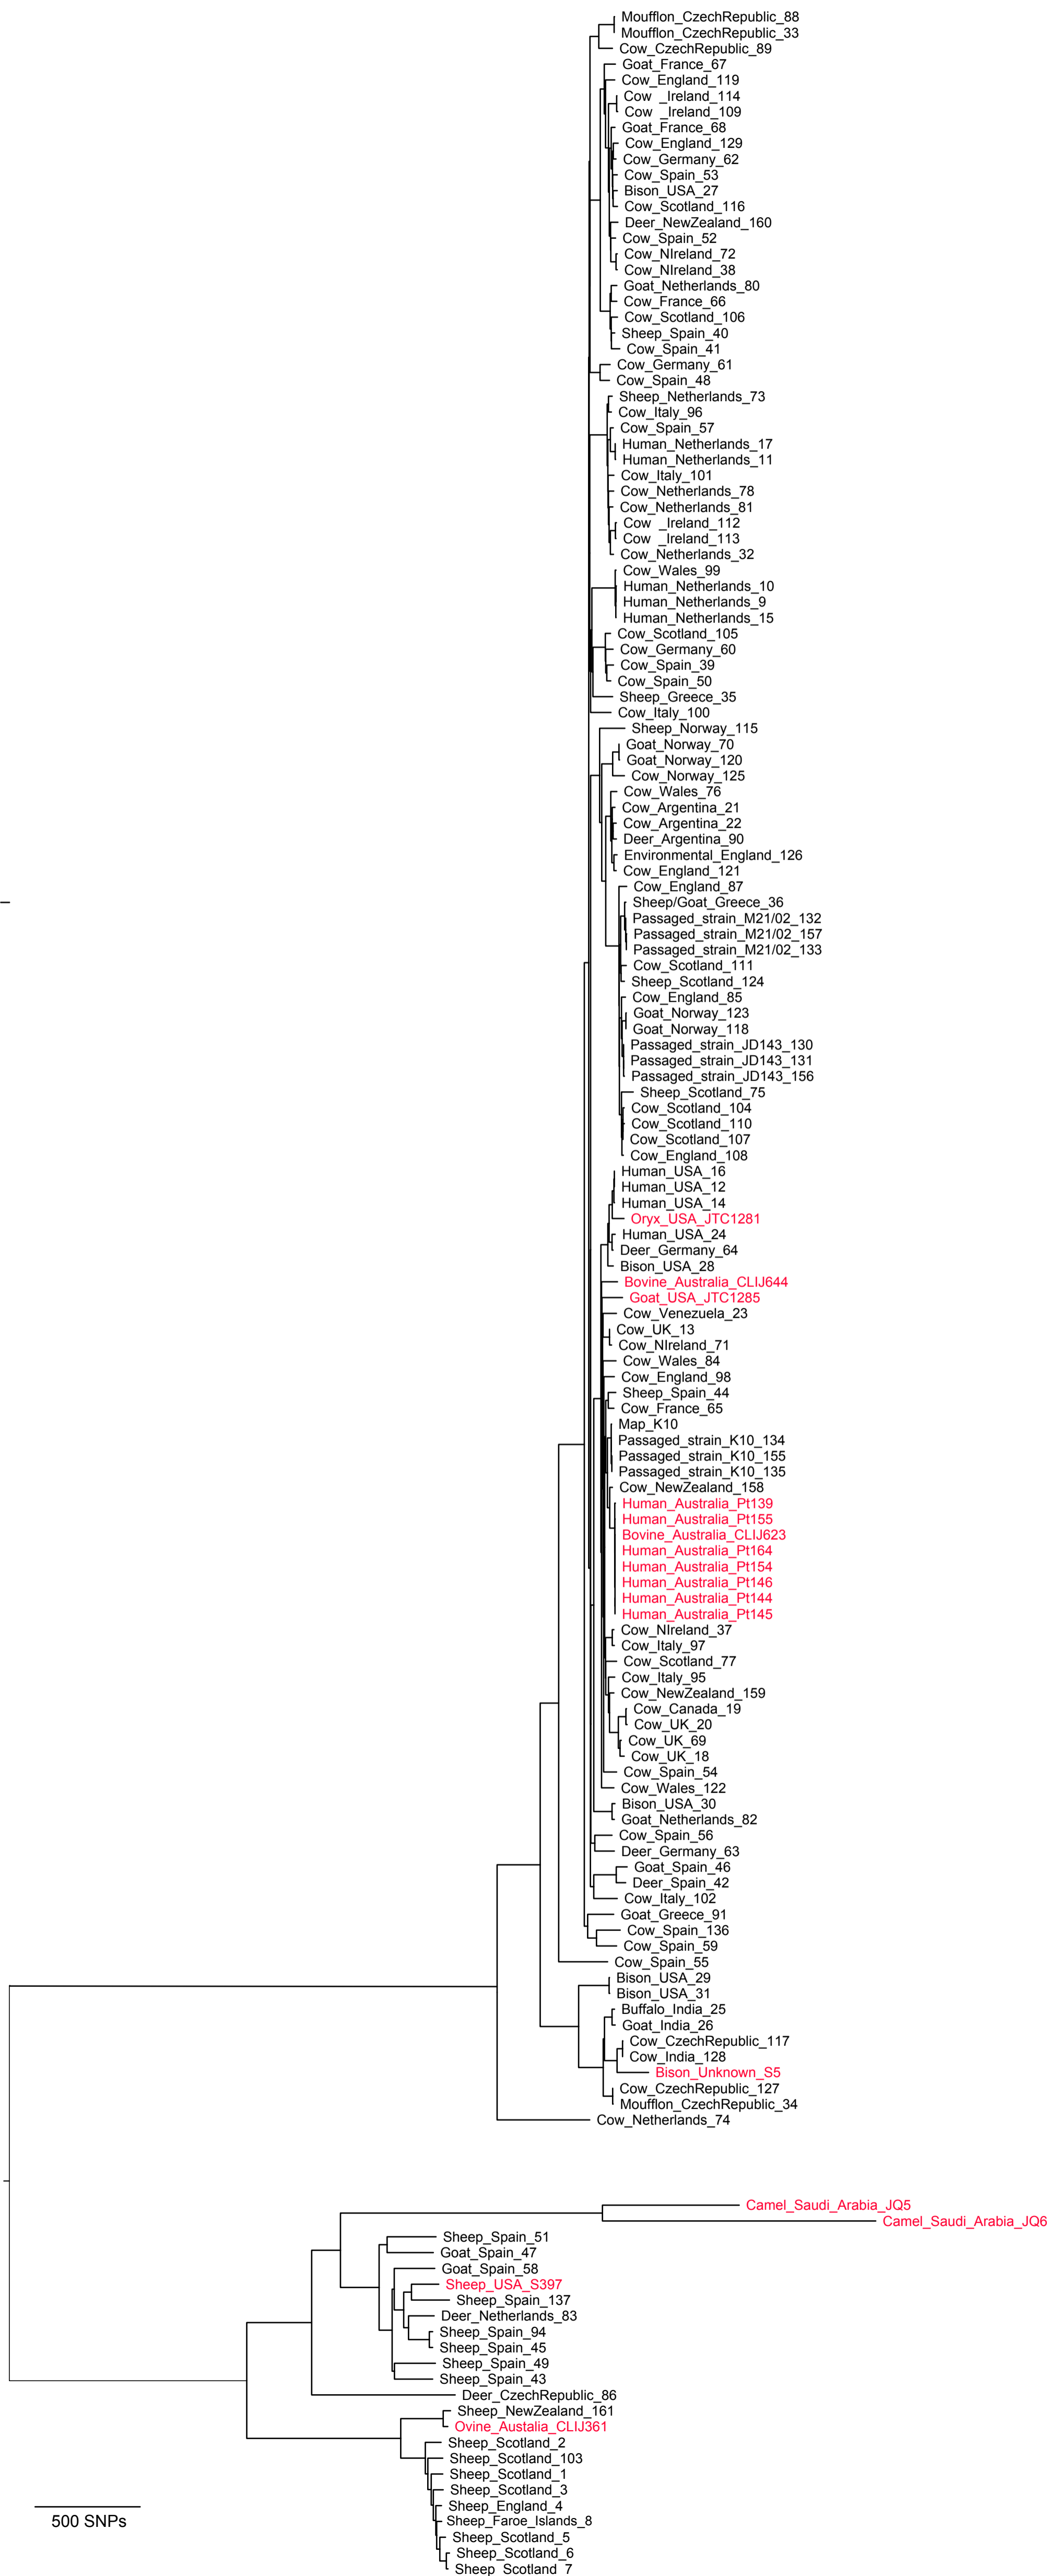

Supplement: 12864_2015_2234_MOESM3_ESM.pdf [file 12864_2015_2234_MOESM3_ESM.pdf]
