# Supplementary material for: Phylogenomic exploration of the relationships between strains of Mycobacterium avium subspecies paratuberculosis
Source: PubMed Central journal article supplement (PMC4729121; doi:10.1186/s12864-015-2234-5), 2016-01-26
Supplement: 12864_2015_2234_MOESM4_ESM.pdf [file 12864_2015_2234_MOESM4_ESM.pdf]

Key (INMV): 1 2 3 6 7 13 17 19 21 25 27 32 33 35 36 68 69 70 71 72 75 78 80 82 84 85 122 126 127 131

Key (MIRU\_292): 2 3 4 5 6 7 8 9 11

Key (MIRU\_x3): 1 2 3

Key (VNTR\_25): 1 2 3 5

Key (VNTR\_47): 2 3 4

Key (VNTR\_3): 1 2

Key (VNTR\_7): 1 2 3 7 8

Key (VNTR\_10): 1 2

Key (VNTR\_32): 6 8 9

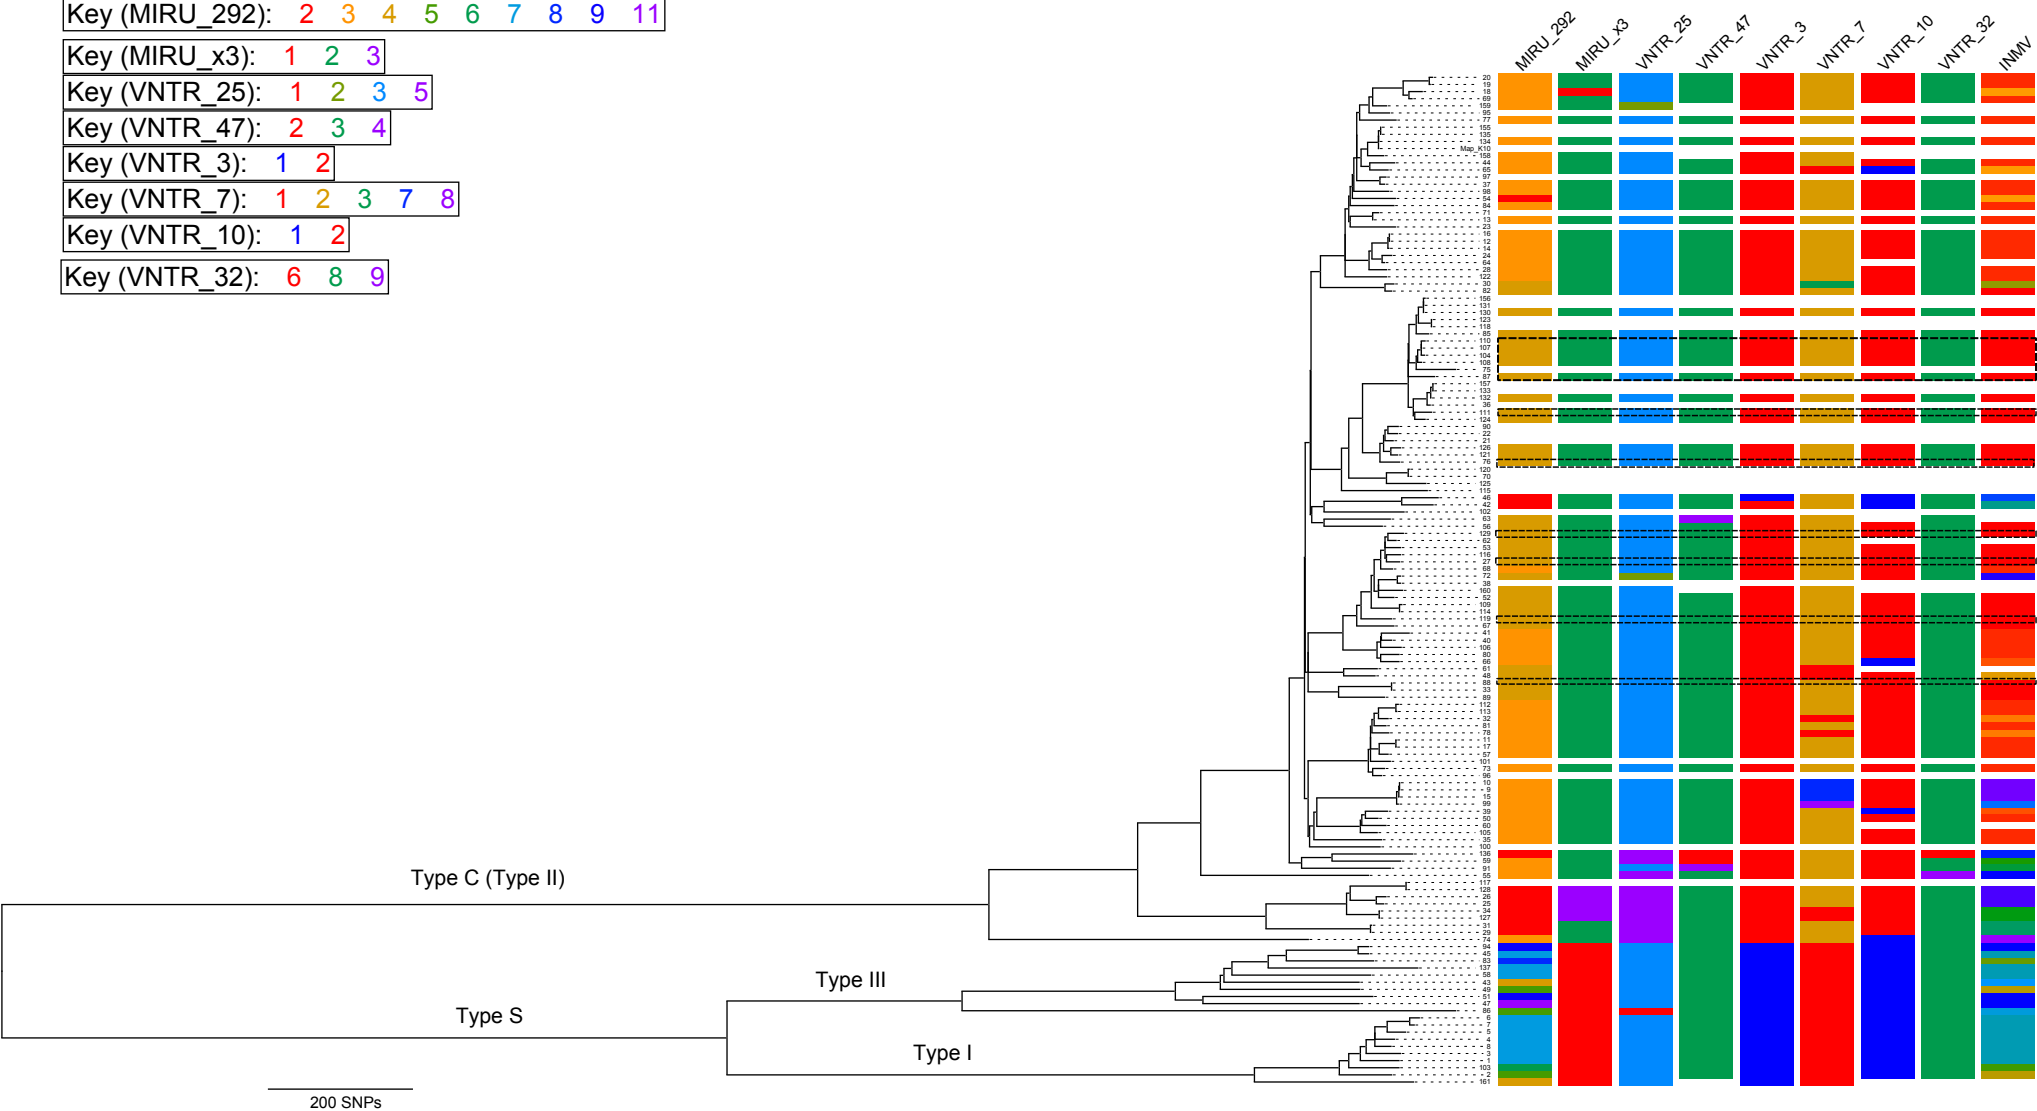

200 SNPs
